# Supplementary material for: Expression and characterization of protein disulfide isomerase family proteins in bread wheat
Source: PubMed Central journal article supplement (PMC4355359; doi:10.1186/s12870-015-0460-2), 2015-03-04
Supplement: 12870_2015_460_MOESM1_ESM.pdf [file 12870_2015_460_MOESM1_ESM.pdf]

|           |     |                    |                    |                   |                   |                     |                    |     |
|-----------|-----|--------------------|--------------------|-------------------|-------------------|---------------------|--------------------|-----|
| TaPDIL1Aα | 1   | <u>MAISKVWISL</u>  | <u>LLALAVVLSA</u>  | <u>PAARAEEAAA</u> | <u>AEEAAAPEA</u>  | <u>VLTLHADNFD</u>   | <u>DAIAKHFFIL</u>  | 60  |
| TaPDIL1Aβ | 1   | <u>MAISKVWISL</u>  | <u>LLALAVVLSA</u>  | <u>PAAS-----</u>  | <u>-----EA</u>    | <u>VLTLHADNFD</u>   | <u>DAIAKHFFIL</u>  | 46  |
| TaPDIL1Aγ | 1   | <u>MAISKVWISL</u>  | <u>LLAL-----</u>   | <u>-----</u>      | <u>-----</u>      | <u>--TLHADNFD</u>   | <u>DAIAKHFFIL</u>  | 32  |
| TaPDIL1Aδ | 1   | <u>MAISKVWISL</u>  | <u>LL-----</u>     | <u>-----</u>      | <u>-----</u>      | <u>--TLHADNFD</u>   | <u>DAIAKHFFIL</u>  | 30  |
| TaPDIL1B  | 1   | <u>MAISKVWISL</u>  | <u>LLALAVVLSA</u>  | <u>PAARAEEAAA</u> | <u>AEEAAAPEA</u>  | <u>VLTLHADNFD</u>   | <u>DAIAKHFFIL</u>  | 60  |
|           |     | *****              | **                 |                   |                   | *****               | *****              |     |
| TaPDIL1Aα | 61  | <u>VEFYAPWCGH</u>  | <u>CKSLAPEYEK</u>  | <u>AAQLLSKHDP</u> | <u>AIVLAKVDAN</u> | <u>DEKNKPLAGK</u>   | <u>YEVQGFPTLK</u>  | 120 |
| TaPDIL1Aβ | 47  | <u>VEFYAPWCGH</u>  | <u>CKSLAPEYEK</u>  | <u>AAQLLSKHDP</u> | <u>AIVLAKVDAN</u> | <u>DEKNKPLAGK</u>   | <u>YEVQGFPTLK</u>  | 106 |
| TaPDIL1Aγ | 33  | <u>VEFYAPWCGH</u>  | <u>CKSLAPEYEK</u>  | <u>AAQLLSKHDP</u> | <u>AIVLAKVDAN</u> | <u>DEKNKPLAGK</u>   | <u>YEVQGFPTLK</u>  | 92  |
| TaPDIL1Aδ | 31  | <u>VEFYAPWCGH</u>  | <u>CKSLAPEYEK</u>  | <u>AAQLLSKHDP</u> | <u>AIVLAKVDAN</u> | <u>DEKNKPLAGK</u>   | <u>YEVQGFPTLK</u>  | 90  |
| TaPDIL1B  | 61  | <u>VEFYAPWCGH</u>  | <u>CKSLAPEYEK</u>  | <u>AAQLLSKHDP</u> | <u>AIVLAKVDAN</u> | <u>DEKNKPLAGK</u>   | <u>YEVQGFPTLK</u>  | 120 |
|           |     | *****              | *****              | *****             | *****             | *****               | *****              |     |
| TaPDIL1Aα | 121 | <u>IFRNGGKNIQ</u>  | <u>EYKGRFAEAG</u>  | <u>IVEYLKKQVG</u> | <u>PASKEIKAPE</u> | <u>DATYLEDGKI</u>   | <u>HIVGVTFEFS</u>  | 180 |
| TaPDIL1Aβ | 107 | <u>IFRNGGKNIQ</u>  | <u>EYKGRFAEAG</u>  | <u>IVEYLKKQVG</u> | <u>PASKEIKAPE</u> | <u>DATYLEDGKI</u>   | <u>HIVGVTFEFS</u>  | 166 |
| TaPDIL1Aγ | 93  | <u>IFRNGGKNIQ</u>  | <u>EYKGRFAEAG</u>  | <u>IVEYLKKQVG</u> | <u>PASKEIKAPE</u> | <u>DATYLEDGKI</u>   | <u>HIVGVTFEFS</u>  | 152 |
| TaPDIL1Aδ | 91  | <u>IFRNGGKNIQ</u>  | <u>EYKGRFAEAG</u>  | <u>IVEYLKKQVG</u> | <u>PASKEIKAPE</u> | <u>DATYLEDGKI</u>   | <u>HIVGVTFEFS</u>  | 150 |
| TaPDIL1B  | 121 | <u>IFRNGGKNIQ</u>  | <u>EYKGRFAEAG</u>  | <u>IVEYLKKQVG</u> | <u>PASKEIKAPE</u> | <u>DATYLEDGKI</u>   | <u>HIVGVTFEFS</u>  | 180 |
|           |     | *****              | *****              | *****             | *****             | *****               | *****              |     |
| TaPDIL1Aα | 181 | <u>GTEFTNFLEL</u>  | <u>AEKLRSDYDF</u>  | <u>GHTVHANHLP</u> | <u>RGDAEVERPL</u> | <u>VRLFKPFDEL</u>   | <u>VVDSKDFDVS</u>  | 240 |
| TaPDIL1Aβ | 167 | <u>GTEFTNFLEL</u>  | <u>AEKLRSDYDF</u>  | <u>GHTVHANHLP</u> | <u>RGDAEVERPL</u> | <u>VRLFKPFDEL</u>   | <u>VVDSKDFDVS</u>  | 226 |
| TaPDIL1Aγ | 153 | <u>GTEFTNFLEL</u>  | <u>AEKLRSDYDF</u>  | <u>GHTVHANHLP</u> | <u>RGDAEVERPL</u> | <u>VRLFKPFDEL</u>   | <u>VVDSKDFDVS</u>  | 212 |
| TaPDIL1Aδ | 151 | <u>GTEFTNFLEL</u>  | <u>AEKLRSDYDF</u>  | <u>GHTVHANHLP</u> | <u>RGDAEVERPL</u> | <u>VRLFKPFDEL</u>   | <u>VVDSKDFDVS</u>  | 210 |
| TaPDIL1B  | 181 | <u>GTEFTNFLEV</u>  | <u>AEKLRSDYDF</u>  | <u>GHTVHANHLP</u> | <u>RGDAEVERPL</u> | <u>VRLFKPFDEL</u>   | <u>VVDSKDFDVS</u>  | 240 |
|           |     | *****              | *****              | *****             | *****             | *****               | *****              |     |
| TaPDIL1Aα | 241 | <u>ALEKFI DASS</u> | <u>TPKVVTFDKN</u>  | <u>PDNHPYLLKY</u> | <u>FQSNAPKAML</u> | <u>FLNFSTGPFE</u>   | <u>SFKSAYYGAV</u>  | 300 |
| TaPDIL1Aβ | 227 | <u>ALEKFI DASS</u> | <u>TPKVVTFDKN</u>  | <u>PDNHPYLLKY</u> | <u>FQSNAPKAML</u> | <u>FLNFSTGPFE</u>   | <u>SFKSAYYGAV</u>  | 286 |
| TaPDIL1Aγ | 213 | <u>ALEKFI DASS</u> | <u>TPKVVTFDKN</u>  | <u>PDNHPYLLKY</u> | <u>FQSNAPKAML</u> | <u>FLNFSTGPFE</u>   | <u>SFKSAYYGAV</u>  | 272 |
| TaPDIL1Aδ | 211 | <u>ALEKFI DASS</u> | <u>TPKVVTFDKN</u>  | <u>PDNHPYLLKY</u> | <u>FQSNAPKAML</u> | <u>FLNFSTGPFE</u>   | <u>SFKSAYYGAV</u>  | 270 |
| TaPDIL1B  | 241 | <u>ALEKFI EASS</u> | <u>TPKVVTFDKN</u>  | <u>PDNHPYLLKF</u> | <u>FQSNAPKAML</u> | <u>FLNFSTGPFE</u>   | <u>SFKKAYYGAV</u>  | 300 |
|           |     | *****              | *****              | *****             | *****             | *****               | *****              |     |
| TaPDIL1Aα | 301 | <u>EEFSGKDVKF</u>  | <u>LIGDIEASQG</u>  | <u>AFQYFGLKED</u> | <u>QAPLILIQDS</u> | <u>DSKKFLKEQV</u>   | <u>EAGQIVAWLK</u>  | 360 |
| TaPDIL1Aβ | 287 | <u>EEFSGKDVKF</u>  | <u>LIGDIEASQG</u>  | <u>AFQYFGLKED</u> | <u>QAPLILIQDS</u> | <u>DSKKFLKEQV</u>   | <u>EAGQIVAWLK</u>  | 346 |
| TaPDIL1Aγ | 273 | <u>EEFSGKDVKF</u>  | <u>LIGDIEASQG</u>  | <u>AFQYFGLKED</u> | <u>QAPLILIQDS</u> | <u>DSKKFLKEQV</u>   | <u>EAGQIVAWLK</u>  | 332 |
| TaPDIL1Aδ | 271 | <u>EEFSGKDVKF</u>  | <u>LIGDIEASQG</u>  | <u>AFQYFGLKED</u> | <u>QAPLILIQDS</u> | <u>DSKKFLKEQV</u>   | <u>EAGQIVAWLK</u>  | 330 |
| TaPDIL1B  | 301 | <u>EEFSGKDVKF</u>  | <u>LIGDIEASQG</u>  | <u>AFQYFGLKED</u> | <u>QAPLILIQDS</u> | <u>DSKKFLKEQV</u>   | <u>EAGQIVAWLK</u>  | 360 |
|           |     | *****              | *****              | *****             | *****             | *****               | *****              |     |
| TaPDIL1Aα | 361 | <u>DYFDGKLTPE</u>  | <u>RKSEPIPEAN</u>  | <u>NEPVKVVVAD</u> | <u>NIHDVVFVKS</u> | <u>KNVLIETFPYAP</u> | <u>WCGHCCKKLAP</u> | 420 |
| TaPDIL1Aβ | 347 | <u>DYFDGKLTPE</u>  | <u>RKSEPIPEAN</u>  | <u>NEPVKVVVAD</u> | <u>NIHDVVFVKS</u> | <u>KNVLIETFPYAP</u> | <u>WCGHCCKKLAP</u> | 406 |
| TaPDIL1Aγ | 333 | <u>DYFDGKLTPE</u>  | <u>RKSEPIPEAN</u>  | <u>NEPVKVVVAD</u> | <u>NIHDVVFVKS</u> | <u>KNVLIETFPYAP</u> | <u>WCGHCCKKLAP</u> | 392 |
| TaPDIL1Aδ | 331 | <u>DYFDGKLTPE</u>  | <u>RKSEPIPEAN</u>  | <u>NEPVKVVVAD</u> | <u>NIHDVVFVKS</u> | <u>KNVLIETFPYAP</u> | <u>WCGHCCKKLAP</u> | 390 |
| TaPDIL1B  | 361 | <u>DYFDGKLTPE</u>  | <u>RKSEPIPEAN</u>  | <u>NEPVKVVVAD</u> | <u>NVHDVVFVKS</u> | <u>KNVLIETFPYAP</u> | <u>WCGHCCKKLAP</u> | 420 |
|           |     | *****              | *****              | *****             | *                 | *****               | *****              |     |
| TaPDIL1Aα | 421 | <u>ILDEAAATLQ</u>  | <u>SEEDVVI AKI</u> | <u>DATANDVPGE</u> | <u>FDVQGYPTLY</u> | <u>FVTPSGKKVS</u>   | <u>YEGGRTADEI</u>  | 480 |
| TaPDIL1Aβ | 407 | <u>ILDEAAATLQ</u>  | <u>SEEDVVI AKI</u> | <u>DATANDVPGE</u> | <u>FDVQGYPTLY</u> | <u>FVTPSGKKVS</u>   | <u>YEGGRTADEI</u>  | 466 |
| TaPDIL1Aγ | 393 | <u>ILDEAAATLQ</u>  | <u>SEEDVVI AKI</u> | <u>DATANDVPGE</u> | <u>FDVQGYPTLY</u> | <u>FVTPSGKKVS</u>   | <u>YEGGRTADEI</u>  | 452 |
| TaPDIL1Aδ | 391 | <u>ILDEAAATLQ</u>  | <u>SEEDVVI AKI</u> | <u>DATANDVPGE</u> | <u>FDVQGYPTLY</u> | <u>FVTPSGKKVS</u>   | <u>YEGGRTADEI</u>  | 450 |
| TaPDIL1B  | 421 | <u>ILDEAAATLQ</u>  | <u>SEEDVVI AKM</u> | <u>DATANDVPSE</u> | <u>FDVQGYPTLY</u> | <u>FVTPSGKKVS</u>   | <u>YEGGRTADEI</u>  | 480 |
|           |     | *****              | *****              | *****             | *                 | *****               | *****              |     |
| TaPDIL1Aα | 481 | <u>VDYIKKNKET</u>  | <u>AGQAAAAATE</u>  | <u>KAAEPAATEP</u> | <u>LKDEL</u>      | <u>515</u>          |                    |     |
| TaPDIL1Aβ | 467 | <u>VDYIKKNKET</u>  | <u>AGQAAAAATE</u>  | <u>KAAEPAATEP</u> | <u>LKDEL</u>      | <u>501</u>          |                    |     |
| TaPDIL1Aγ | 453 | <u>VDYIKKNKET</u>  | <u>AGQAAAAATE</u>  | <u>KAAEPAATEP</u> | <u>LKDEL</u>      | <u>487</u>          |                    |     |
| TaPDIL1Aδ | 451 | <u>VDYIKKNKET</u>  | <u>AGQAAAAATE</u>  | <u>KAAEPAATEP</u> | <u>LKDEL</u>      | <u>485</u>          |                    |     |
| TaPDIL1B  | 481 | <u>VDYIKKNKET</u>  | <u>AGQ--AATE</u>   | <u>KAAEPAATEP</u> | <u>LKDEL</u>      | <u>512</u>          |                    |     |
|           |     | *****              | **                 | *****             | *****             | *****               | *****              |     |

**Figure S1. Alignment of amino acid sequences of TaPDIL1Aα, TaPDIL1Aβ, TaPDIL1Aγ, TaPDIL1Aδ, and TaPDIL1B.** The putative signal peptide (underlined), active center CGHC motifs (shaded in black), N-glycosylation consensus asparagine (shaded in gray), conserved arginine (box with straight lines), and glutamic acid (box with dotted lines) are indicated. Asterisks indicate positions that have a single, fully conserved residue.
