# Supplementary material for: Expression and characterization of protein disulfide isomerase family proteins in bread wheat
Source: PubMed Central journal article supplement (PMC4355359; doi:10.1186/s12870-015-0460-2), 2015-03-04
Supplement: 12870_2015_460_MOESM3_ESM.pdf [file 12870_2015_460_MOESM3_ESM.pdf]

```

TaPDIL2      1 MAAMPMPRSL LLILLLATPL LILPLAAAAV PTSNPDIDLE YLIKNAGLDD PTPATTATDP 60
TaPDIL2-1    1 MAAMPMPRSL LLILLLATPL LILPLAAAAV PTSNPDIDLE YLIKNAGLDD PTPATTATDP 60
      *****

TaPDIL2      61 EDDGAPDFPG LDADYDDEDL FGDDDGPEED SSHPSAADEA HVLLLLTAA1NF TSVLAARRHV 120
TaPDIL2-1    61 EDDGAPDFPG LDADYDDEDL FGDDDGPEED SSHPSAADEA HVLLLLTAA1NF TSVLAARRHV 120
      *****

TaPDIL2      121 M1V1E1F1YAPWCG HCRALAPHYA AAASALAEQG VDVALAKVDA TEDHDLAQAH GVQGYPTLLF 180
TaPDIL2-1    121 M1V1E1F1YAPWCG HCRALAPHYA AAASALAEQG VDVALAKVDA TEDHDLAQAH GVQGYPTLLF 180
      *****

TaPDIL2      181 FIDGVPRDYA GERTKDAIVA WISKKLGPAV Q1NLTTADEAE KIVTGD1DDVAV LAYLDHLSGA 240
TaPDIL2-1    181 FIDGVPRDYA GERTKDAIVA WISKKLGPAV Q1NLTTADEAE KIVTGD1DDVAV LAYLDHLSGA 240
      *****

TaPDIL2      241 HSDELAASR LEDTISFYQT TSPDVAKLFH IDPEAKRPSV VLLKKEEEKL TVFDGEFRAS 300
TaPDIL2-1    241 HSDELAASR LEDTISFYQT TSPDVAKLFH IDPEAKRPSV VLLKKEEEKL TVFDGEFRAS 300
      *****

TaPDIL2      301 AIAEFVSANK IPLITTLTQE TAPAI1FDNPI KKQILLFAVA KES1PQFLPII KETAKSFKGK 360
TaPDIL2-1    301 AIAEFVSANK IPLITTLTQE TAPAI1FDNPI KKQILLFAVA K1GSPQFLPII KETAKSFKGK 360
      *****

TaPDIL2      361 LLFV1FVERDN EEVGE1PVANY FGIAGQETTV LAYTGNEDAK KFFFSGEISL DTIKEFAQDF 420
TaPDIL2-1    361 LLFV1FVERDN EEVGE1PVANY FGIAGQETTV LAYTGNEDAK KFFFSGEISL DTIKEFAQDF 420
      *****

TaPDIL2      421 LEDKLT1PSYK SDPV1PESNDE DVKVVVGKSL DQIVLDESKD VLL1E1F1YAPWCG GHCQSLEPIY 480
TaPDIL2-1    421 LEDKLT1PSYK SDPV1PESNDE DVKVVVGKSL DQIVLDESKD VLL1E1F1YAPWCG GHCQSLEPIY 480
      *****

TaPDIL2      481 NKLAKYLRGI DSLVI1AKMDG TNNEHPRAKP DGFPTILFYP AGKKSFE1PIT FEG1ERTV1VEM 540
TaPDIL2-1    481 NKLAKYLRGI DSLVI1AKMDG TNNEHPRAKP DGFPTILFYP AGKKSFE1PIT FEG1ERTV1VEM 540
      *****

TaPDIL2      541 YKFLK1KHAAI PFKL1KRPDSS AARTD---GP GSTAEGEKSS GSNPKDEL 585
TaPDIL2-1    541 YKFLK1KHAAI PFKL1KRPDSS AARTDGDAGS GSTTEGEEKSS GSNPKDEL 588
      *****

```

**Figure S3. Alignment of the amino acid sequences of TaPDIL2 and TaPDIL2-1\*.** The putative signal peptide (underlined), active center CGHC motifs (shaded in black), N-glycosylation consensus asparagine (shaded in gray), conserved arginine (box with straight lines), and glutamic acid (boxes with dotted lines) are indicated. \*GenBank accession number: AK07151
