# Supplementary material for: Expression and characterization of protein disulfide isomerase family proteins in bread wheat
Source: PubMed Central journal article supplement (PMC4355359; doi:10.1186/s12870-015-0460-2), 2015-03-04
Supplement: 12870_2015_460_MOESM4_ESM.pdf [file 12870_2015_460_MOESM4_ESM.pdf]

```

TaPDIL2      29 AVPTSNPDID LEYLIKNA GL DDPTPATTAT DPEDDGAPDF PGLDADYDDE DLFGDDDGPE 88
GmPDIL-2    26 --LTDEEDLG F-----L DEFS----- -----AAPEH G---HYHDDD ANFGDFEEDP 61
          *: *:. :      * *: :      .*: :      **: :      *** :

TaPDIL2      89 EDSSHPSAAD EAHVLLLTAA NFTSVLAARR HVMV⋮EFYAPW CGHCRALAPH YAAAASALAE 148
GmPDIL-2    62 EAYKQP-EVD EKDVVILKEK NFTDTVKSNR FVMV⋮EFYAPW CGHCQALAPE YAAAATELKG 120
          * .:* . * * .*: : * .*: : : * .***** ***** .***** .***** :

TaPDIL2     149 QGVDVALAKV DATEDHDLAQ AHGVQGYPTL LFFIDGVPRD YAG⋮RTKDAI VAWISKKLG 208
GmPDIL-2   121 E--DVILAKV DATEENELAQ QYDVQGFPTV YFFVDGIHQP YNG⋮RTKDAI MTWIKKIGP 178
          : ** **** *****: : * .*: : : * * :***** : : * .*: :

TaPDIL2     209 AVQNLTTADE AEKIVTGDDV AVLAYLDHLS GAHSEDLAAA SRLEDTISFY QTTSPDVAKL 268
GmPDIL-2   179 GIYNLTTVED AQRILTNETK VVLGFLNSLV GPESEELAAA SRLEDDVNFY QTVDPDVAKL 238
          .: *****: * : : * .: . * .*: : * * .*: :***** ***** : * * .*****

TaPDIL2     269 FHIDPEAKRP SVVLLKKEEE KLTVFDGEFR ASAIAEFVSA NKIPLITTLT QETAPAIFDN 328
GmPDIL-2   239 FHIDPDVKKR ALILVKKEEE KLNHFDGKFE KSEIADFVFS NKLPVLTIFT RESAPSVFEN 298
          *****: * * : : * :***** * . * * : * * * : * : * : * : * : * : * : * :

TaPDIL2     329 PIKKQILLFA VAKESPQFLP IIKETAKSFK GKLLFVVER DNEEVGEPVA NYFGIAGQET 388
GmPDIL-2   299 PIKKQLLLFA TSNDSEKLIP AFKEAAKSFK GKLI⋮FVYVEM DNEDVGKPVV EYFGISGNAP 358
          *****: * * : : * : * : * : * : * : * : * : * : * : * : * : * : * :

TaPDIL2     389 TVLAYTGNED AKKFFFSGEI SLDTIKEFAQ DFLEDKLTPS YKSDVPESND EDVKVVVGK 448
GmPDIL-2   359 KVLGYTGNDG GKKFVLDGEV TADKIKAFGD DFLEDKLPF YKSDVPESND GDVKIVVGN 418
          . * . * * : * . * * . : * . * * * : * * * * * * * * * * * * * * * * * * * * * *

TaPDIL2     449 SLDQIVLDES KDVL⋮IVYAP WCGHCQSLEP IYNKLAKYLR GIDSLVIKAM DGTNNEHPRA 508
GmPDIL-2   419 NFDEIVLDES KDVL⋮IIYAP WCGHCQALEP IYDKLAKHLR NIESLVIKAM DGTNNEHPRA 478
          . : . * * * * * * * * * * * * * * * * * * * * * * * * * * * * * * * * * * *

TaPDIL2     509 KPDGFPTILF YPAGKSFEP ITFEG⋮RTVV EMYKFLKHA AIPFKLKRPD SSAARTDGP 568
GmPDIL-2   479 KPDGFPTLLF FPAGNKSFPD ITVD⋮RTVV AFYKFLKHA SIPFKLQKPT S---TSDAKG 535
          * * * * * * * * * * * * * * * * * * * * * * * * * * * * * * * * * * *

TaPDIL2     569 STAEGEKSSG SNPKDEL 585
GmPDIL-2   536 SSDAKE-SQS SDVKDEL 551
          * : * * . * : * * *

```

**Figure S4. Alignment of the amino acid sequences of TaPDIL2 and soybean GmPDIL-2.** The active center CGHC motifs (shaded in black), conserved arginines (box with straight lines), and glutamic acid (boxes with dotted lines) are indicated. Asterisks indicate positions that have a single, fully conserved residue. Colon indicates conservation between groups of strongly similar properties. Period indicates conservation between groups of weakly similar properties.
