# Supplementary material for: Expression and characterization of protein disulfide isomerase family proteins in bread wheat
Source: PubMed Central journal article supplement (PMC4355359; doi:10.1186/s12870-015-0460-2), 2015-03-04
Supplement: 12870_2015_460_MOESM6_ESM.pdf [file 12870_2015_460_MOESM6_ESM.pdf]

```

TaPDIL4D 31 DEVLALTEST FEKEVGQDRG ALV·EFYAPWC· GH·CKKLAPEY EKLAASFKA KSVLIAKVDC 90
GmPDIS-1 28 DDVVVLS·EDN FEKEVGQDRG ALV·EFYAPWC· GH·CKKLAPEY EKL·GSSFKA KSVLIGKVDC 87
GmPDIS-2 27 DDVVALTEET FENEVGKDRA ALV·EFYAPWC· GH·CKRLAPEY EQLGASFKKT KSVLIAKVDC 86
*:.:.*:*. ** *** ** ***** *****:***** * *.:**** *****:***

TaPDIL4D 91 DEHKSVC·SKY G·VSGYPTIQW FPKGSLEPKK YEG·RTAEAL TEYVNSEAA·T NVKIAAVPSS 150
GmPDIS-1 88 DEHKS·LC·SKY G·VSGYPTIQW FPKGSLEPKK YEG·RTAESL VEFVNT·EGGT NVKIATVPSN 147
GmPDIS-2 87 DEHKS·VCGKY G·VSGYPTIQW FPKGSLEPKK YEG·RTAEAL AAFVNI·EAGT NVKIASVASS 146
*****:* ** ***** ***** *****:*. .:* *..* *****:* *

TaPDIL4-1 151 VVVLTEETFD SVVLDETKDV LV·EFYAPWCG· H·CKSLAPIYE KVASVFKQDE GVVIANLDAD 210
GmPDIS-1 148 VVVLTPENFN EVVLDETKDV LV·EFYAPWCG· H·CKSLAPTYE KVATAFKLEE DVVIANLDAD 207
GmPDIS-2 147 VVVLSPNNFD EVVFD·ETKDV LV·EFYAPWCG· H·CKALAPIYE KVAAAFNLDK DVVIANVDAD 206
*****: .*: .*:***** ***** *****:*** ** ** ***:*. .: .*****:***

TaPDIL4D 211 KYTSLAEKYG VSGFPTLKFF PKGNKAGEEY ESG·FDLDDFV KFINEKSGTS RDSKGQLTSE 270
GmPDIS-1 208 KYRDLAEKYD VSGFPTLKFF PKGNKAGEDY GGF·FDLDDFV AFINEKSGAS RDGKGQLTSQ 267
GmPDIS-2 207 KYKDLAEKYG VSGYPTLKFF PKSNKAGENY DGG·FDLDDFV AFINEKCGTY RDGKGQLTSK 266
** .*****. **.****** **.******:*. .*:***** *****:*. **.******

TaPDIL4D 271 AGLVASLDAL VKEFSAADD KRKEILSKIE EEAAKLSGPA VKHGKIYVNV AKKILQKGS·D 330
GmPDIS-1 268 AGIVESLDVL VKEFVAASDE EKKS·VFTRLE EEVVKLKGSA SRYGKIYLKA AKNYREKGS·D 327
GmPDIS-2 267 AGIIASLDDL VKEFVSADSN EKKAVYSRLE EEVKKLKGSS ARHGDLYLKL AKKGM·EKGAD 326
**:. **.* *****:*. .:*. .:*. *****:*** **.* **.* **.* **.* **.*

TaPDIL4D 331 YTKKETERLH R·LLEKSISPS KADEF·AIKKN ILSAFSS 367
GmPDIS-1 328 YAKNEIQRLQ R·ILDKSISPA KADEL·TLKKN ILSTYAA 364
GmPDIS-2 327 YAKNEIQRLE R·MLEKSVSPA KADEF·TLKKN ILSIFA 362
*:.:.*:*. **.*:***: *****:*** **.*:

```

**Figure S6. Alignment of the amino acid sequences of TaPDIL4D, soybean GmPDIS-1, and soybean GmPDIS-2.** The active center CGHC motifs (shaded in black), conserve arginine (box with straight lines), and glutamic acid (boxes with dotted lines) are indicated. Asterisks indicate positions that have a single, fully conserved residue. Colon indicates conservation between groups of strongly similar properties. Period indicates conservation between groups of weakly similar properties.
