# Supplementary material for: Expression and characterization of protein disulfide isomerase family proteins in bread wheat
Source: PubMed Central journal article supplement (PMC4355359; doi:10.1186/s12870-015-0460-2), 2015-03-04
Supplement: 12870_2015_460_MOESM8_ESM.pdf [file 12870_2015_460_MOESM8_ESM.pdf]

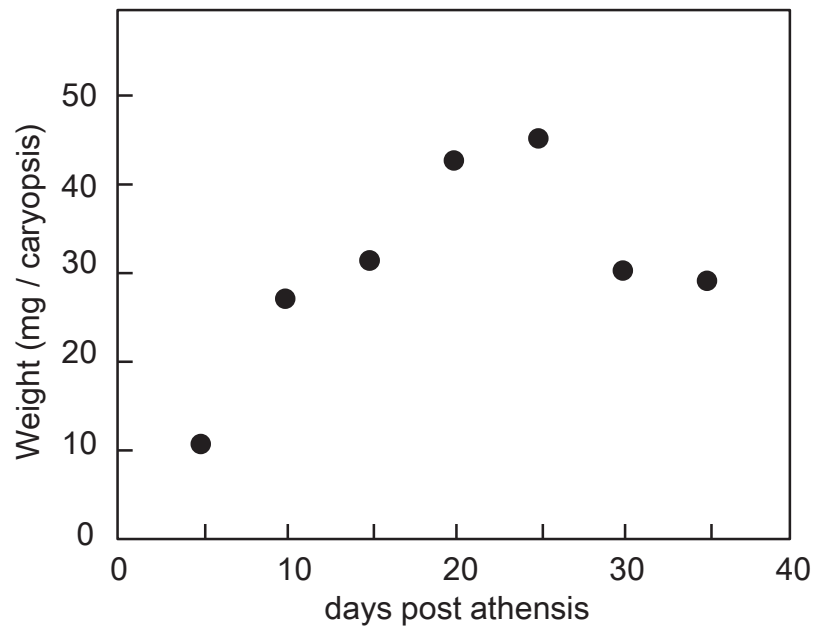

**Figure S8. Caryopsis weight after anthesis.** Wheat caryopses (30–100 grains) were collected and weighed. Average values per caryopsis were plotted.
