# Supplementary material for: Expression and characterization of protein disulfide isomerase family proteins in bread wheat
Source: PubMed Central journal article supplement (PMC4355359; doi:10.1186/s12870-015-0460-2), 2015-03-04
Supplement: 12870_2015_460_MOESM9_ESM.pdf [file 12870_2015_460_MOESM9_ESM.pdf]

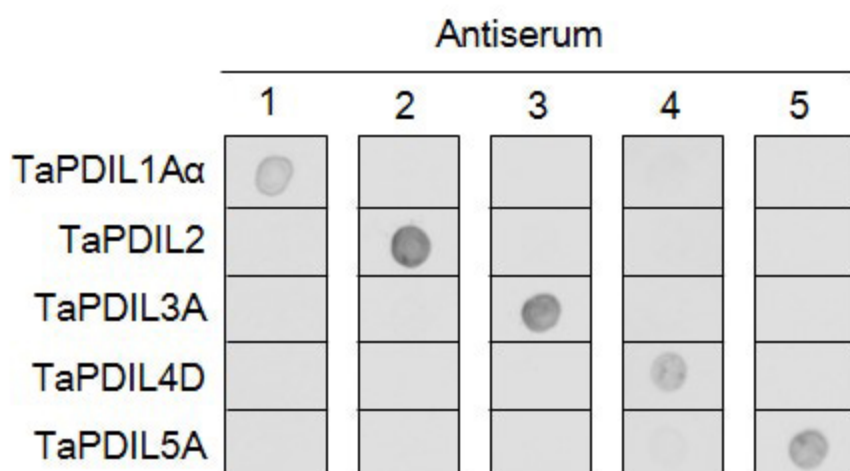

**Figure S9. Dot blot analysis of recombinant wheat PDI family proteins.** Recombinant TaPDIL1A $\alpha$ , TaPDIL2, TaPDIL3A, TaPDIL4D, and TaPDIL5A (each 10 ng/5  $\mu$ L) were spotted on a nitrocellulose membrane and immunolabeled with anti-TaPDIL1A $\alpha$  (1), anti-TaPDIL2 (2), anti-TaPDIL3A (3), anti-TaPDIL4D (4), or anti-TaPDIL5A serum (5).
