# Supplementary material for: Expression and characterization of protein disulfide isomerase family proteins in bread wheat
Source: BMC Plant Biol. 2015 Mar 4;15:73. doi: 10.1186/s12870-015-0460-2 (PMC4355359; doi:10.1186/s12870-015-0460-2)
Supplement: Additional file 2: Figure S2. — Alignment of amino acid sequences of TaPDIL1Aα and soybean GmPDIL-1. [file 12870_2015_460_MOESM2_ESM.pdf]

```

TmPDIL1Aα  26 EEA AAAEEAA A APEAVLTLH ADFNDDAIK HPFILV E FYA PWCGHCCKSLA PEYEKAAQLL 85
GmPDIL-1   38 -----EES SEKEFVLTL D HSNFHDVSK HDFIV E FYA PWCGHCCKKLA PEYEKAASIL 90
          * : : * ****. .**.*::* * *:***** *****.* *****.:*

TmPDIL1Aα  86 SKHDP AIVLA KVDANDEKKN PLAGKYEVQG FPTLKIFRNG GKNIQEYKGP EAEAGIVEYL 145
GmPDIL-1   91 SSHDPPVVL A KIDANEKKN DLASQYDVRG YPTIKILRNG GKNVQEYKGP EADGIVDYL 150
          *.***.:** *:***:*** **.:*:** *:***:*** *:***** ***:***:**

TmPDIL1Aα  146 KKQVGPASKE IKAPEDAT-Y LEDGKI HIVG VFTEFSGTEF TNFLELAEKL RSDYDFGHTV 204
GmPDIL-1-1 151 KKQSGPASTE IKSAD EATAF IGENKVAIVG VFPKFSGE EF DNFSALAEKL RSDYDFGHTL 210
          *** ***. * **:.:** : : .*: ** **.:*** ** ** ***** *****:

TmPDIL1Aα  205 HANHLPRGDA AVERPLVRLF KPFD ELVVD S KDFDVSALEK FIDASSTPKV VTFDKNPDNH 264
GmPDIL-1   211 NAKHLPRGES SVSGPVVRLF KPFD ELFVDF QDFNVEALEK FVEESSTPVV TVFNNEPSNH 270
          :*:*****: *. *:*** *****.* ***:*.*** *:*** * ..:::*.**

TmPDIL1Aα  265 PYLLKYFQSN APKAM LFLNF STGPFESFKS AYYGAVEEFS GKDVKFLIGD IEASQGAFQY 324
GmPDIL-1-1 271 PFVVKFFNSP NAKAM LFINF TAEGAEAIKS KYREAAEQYK QQGV SFLVGD VESSQGAFQY 330
          *:.*:*. * .*****: : : *:** * *.*:.. :*.**:* :*:*****

TmPDIL1Aα  325 FGLKEDQAPL ILIQDSDSKK FLKEQVEAGQ I VAWLKDYFD GKLT PFRKSE PIPEANNEPV 384
GmPDIL-1   331 FGLKEEQVPL IIIQHNDGKK FFKPNLEADH IPTWLKAYKD GHVAPFVKSE PIPETNDEPV 390
          *****.* ** *:***..** *: * :*:.. : * :*** * * *:*** ** *****:***

TmPDIL1Aα  385 KVVVADNIHD VVFKSGKNVL E F YAPWCGH CKKLAPILDE AAATLQSEED VVI AKIDATA 444
GmPDIL-1   391 KVVVGASLED IVFKSGKNVL E F YAPWCGH CKQLAPILDE VAISYQNEAD VVI AKLDATA 450
          ****. .: * :***** :***** ***:***** . * : * * *****:***

TmPDIL1Aα  445 NDVPGE-FDV QGYPTLYFVT PSGKKVSYEG E TADEIVDY IKKNKETAGQ AAAAATEKAA 503
GmPDIL-1   451 NDIPSETFDV QGYPTVYFRS ASGKLSQYDG E TKEDIIEF IEKNRDKPAQ QE QGKDEQE Q 510
          **:.* ** ** *****: : .*** .*: * ** :*:.. :*:***. . * :

TmPDIL1Aα  504 EPAATEPLKDEL 515
GmPDIL-1   511 G-----KDEL 515
          ****

```

**Figure S2. Alignment of the amino acid sequences of TaPDIL1Aα and soybean GmPDIL-1.** The active center CGHC motifs (shaded in black), conserved arginine (box with straight lines), and glutamic acid (boxes with dotted lines) are indicated. Asterisks indicate the positions that have a single, fully conserved residue. Colon indicates conservation between groups of strongly similar properties. Period indicates conservation between groups of weakly similar properties.
